# Supplementary material for: The construction of supramolecular polymers through anion bridging: from frustrated hydrogen-bonding networks to well-ordered linear arrays
Source: Royal Society of Chemistry journal article supplement (doi:10.1039/c5py01284h), 2015-01-01
Supplement: c5py01284h1.pdf [file c5py01284h1.pdf]

## *Electronic Supplementary Information*

The construction of supramolecular polymers through anion  
bridging: from frustrated hydrogen-bonding network to well-ordered  
linear arrays

Tian-Guang Zhan, Tian-You Zhou, Qiao-Yan Qi, Jian Wu, Guang-Yu Li  
and Xin Zhao\*

Key Laboratory of Synthetic and Self-assembly Chemistry for Organic Functional  
Molecules, Shanghai Institute of Organic Chemistry, Chinese Academy of Sciences  
345 Lingling Road, Shanghai 200032, China

E-mail: xzhao@mail.sioc.ac.cn.

### Experimental Section

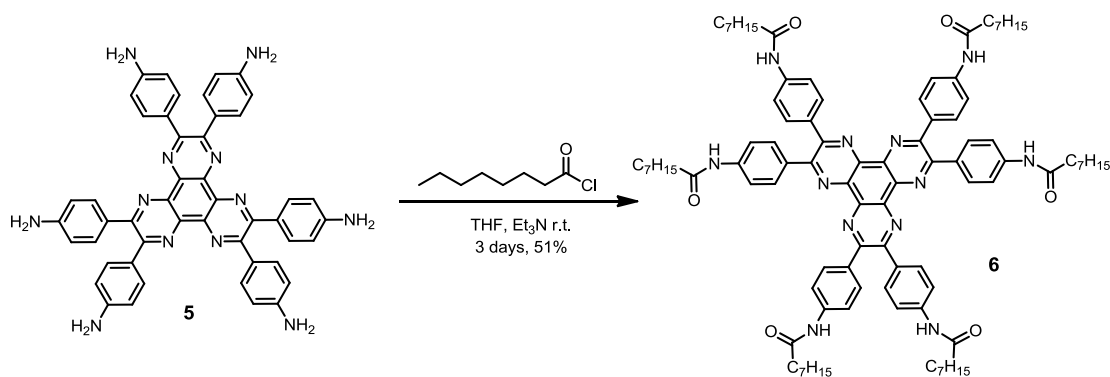

**Compound 6.** A mixture of compound **5** (0.155 g, 0.2 mmol) and octanoyl chloride (3.72 g, 18.96 mmol) were dissolved in 150 mL anhydrous THF, and 10 mL anhydrous Et<sub>3</sub>N was added, which was then stirred at room temperature under argon atmosphere for 3 days. When the reaction was completed monitored by TLC, the solvent was removed under reduced pressure, the resulting solid was washed by water and ethyl ether, respectively, and dried. Compound **6** was obtained as a yellow

solid (0.155 g, 51%).  $^1\text{H}$  NMR (400 MHz,  $\text{DMSO-}d_6$ ):  $\delta$  (ppm) 10.06 (s, 6 H), 7.69-7.61 (dd,  $J_1 = 8$  Hz,  $J_2 = 8$  Hz 24 H), 2.34 (t,  $J = 16$  Hz, 12 H), 1.61 (s, 12 H), 1.35-1.19 (m, 48 H), 0.87 (t,  $J = 16$  Hz, 18 H).  $^{13}\text{C}$  NMR (100 MHz,  $\text{DMSO-}d_6$ ):  $\delta$  171.60, 152.73, 140.28, 139.12, 132.91, 130.47, 118.55, 36.51, 28.67, 28.50, 25.06, 23.18, 22.09, 13.94. MS (MALDA-TOF):  $m/z$  1561.0 $[\text{M} + \text{H} + \text{Na}]^+$ , 1540.0 $[\text{M} + 3\text{H}]^+$ , 1412.9 $[\text{M} - \text{C}_8\text{H}_{15}\text{O} + 3\text{H}]^+$ , 1286.8 $[\text{M} - 2\text{C}_8\text{H}_{15}\text{O} + 3\text{H}]^+$ , 1159.6 $[\text{M} - 3\text{C}_8\text{H}_{15}\text{O} + 3\text{H}]^+$ , 1033.5 $[\text{M} - 4\text{C}_8\text{H}_{15}\text{O} + 3\text{H}]^+$ . HRMS (MALDA-TOF): Calcd. for  $\text{C}_{96}\text{H}_{120}\text{N}_{12}\text{O}_6\text{Na}$   $[\text{M} + \text{Na}]$  1559.9334, Found: 1559.9346.

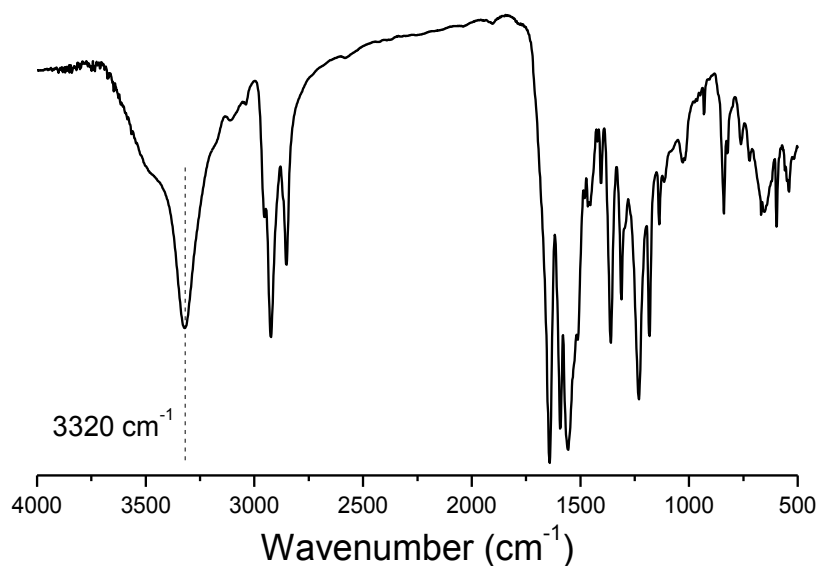

**Figure S1.** FT-IR spectrum of compound **1**.

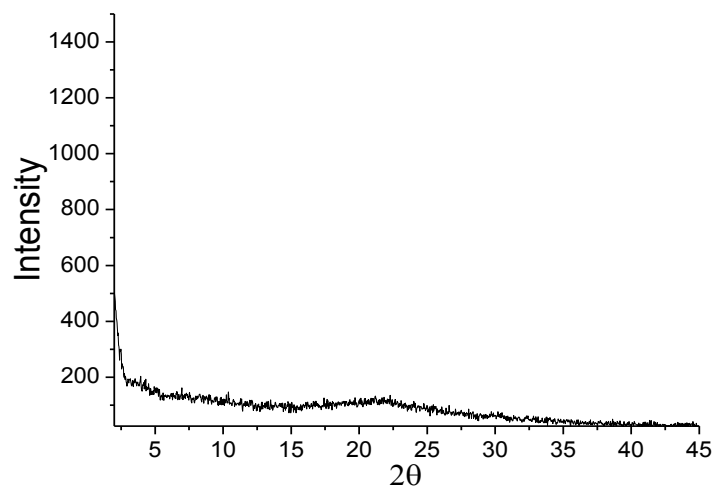

**Figure S2.** Powder XRD pattern of compound **1** in solid state.

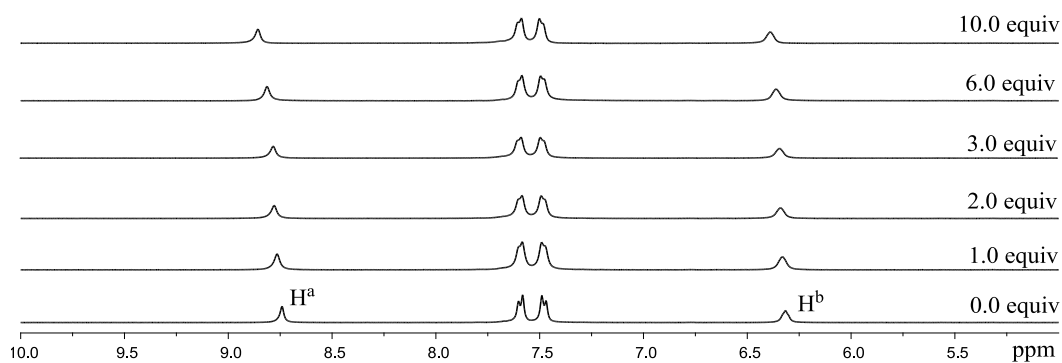

**Figure S3.** Partial  $^1\text{H}$  NMR (400 MHz) spectra of compound **1** (6.0 mM) upon addition of TBABr in  $\text{DMSO-}d_6$  at 25 °C.

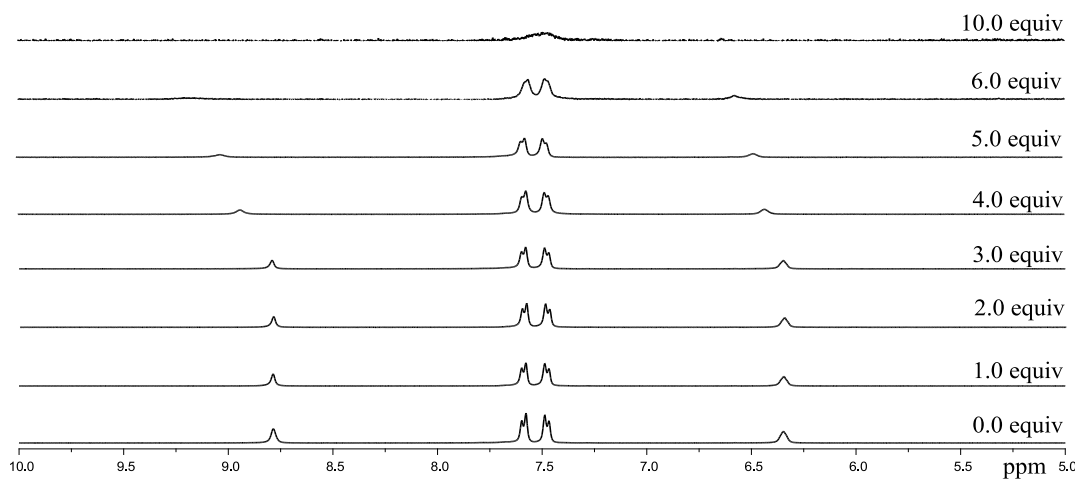

**Figure S4.** Partial  $^1\text{H}$  NMR (400 MHz) spectra of **1** (6.0 mM) upon addition of TBAF in  $\text{DMSO-}d_6$  at 25 °C.

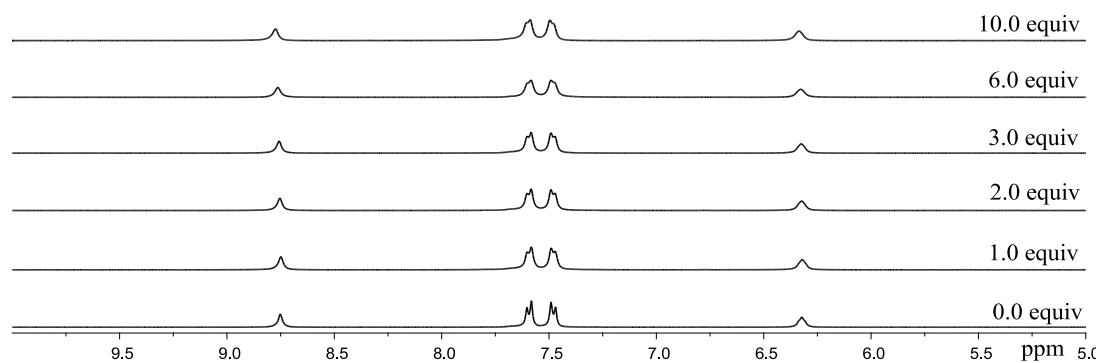

**Figure S5.** Partial  $^1\text{H}$  NMR (400 MHz) spectra of **1** (6.0 mM) upon addition of TBACl in  $\text{DMSO-}d_6$  at 25 °C.

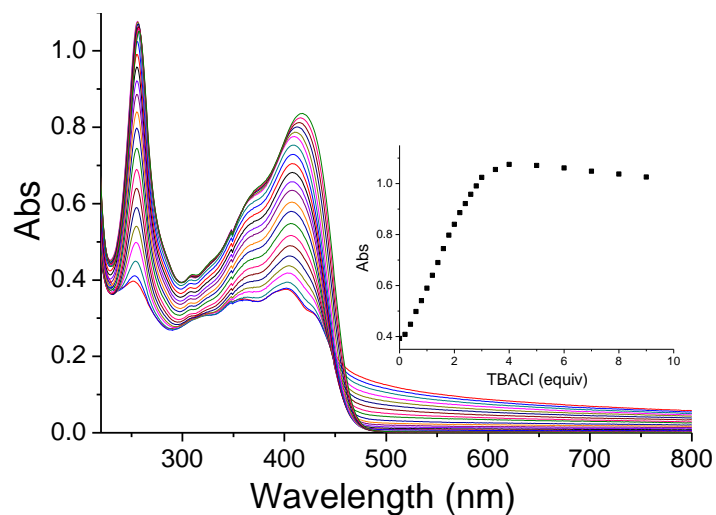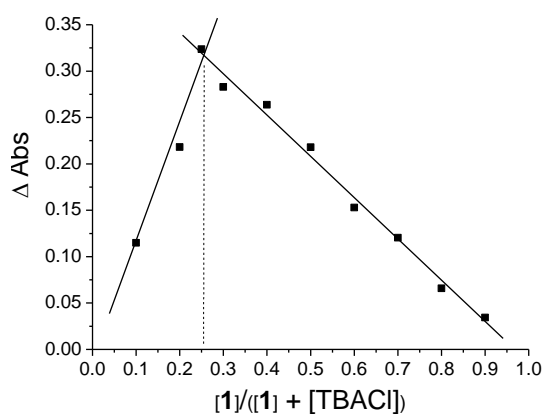

**Figure S6.** UV-vis absorption spectra of **1** (0.015 mM) upon addition of TBACl (from 0 to 9 equiv) in THF at 25 °C (Inset: the plot of the absorbance at 255 nm vs [TBACl]) (top), and Job's plot indicating a 1:3 stoichiometry for **1** and  $\text{Cl}^-$  (bottom). The total concentration for conducting Job's plot was 0.03 mM.

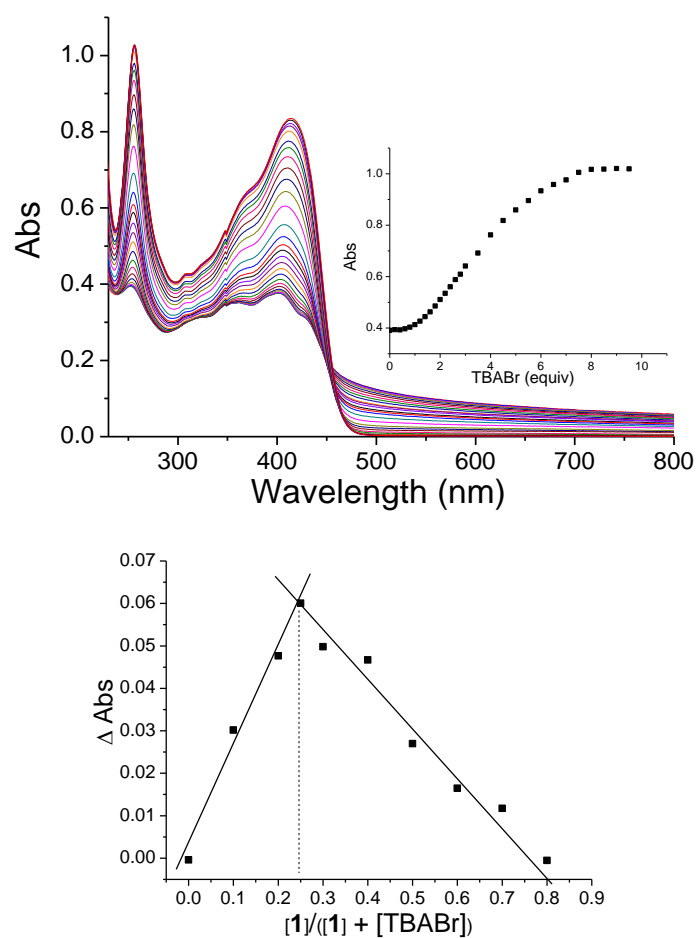

**Figure S7.** UV-vis absorption spectra of **1** (0.015 mM) upon addition of TBABr (from 0 to 9 equiv) in THF at 25 °C (inset: the plot of the absorbance at 255 nm vs [TBABr]) (top), and Job's plot indicating a 1:3 stoichiometry for **1** and  $Br^-$  (bottom). The total concentration for conducting Job's plot was 0.03 mM.

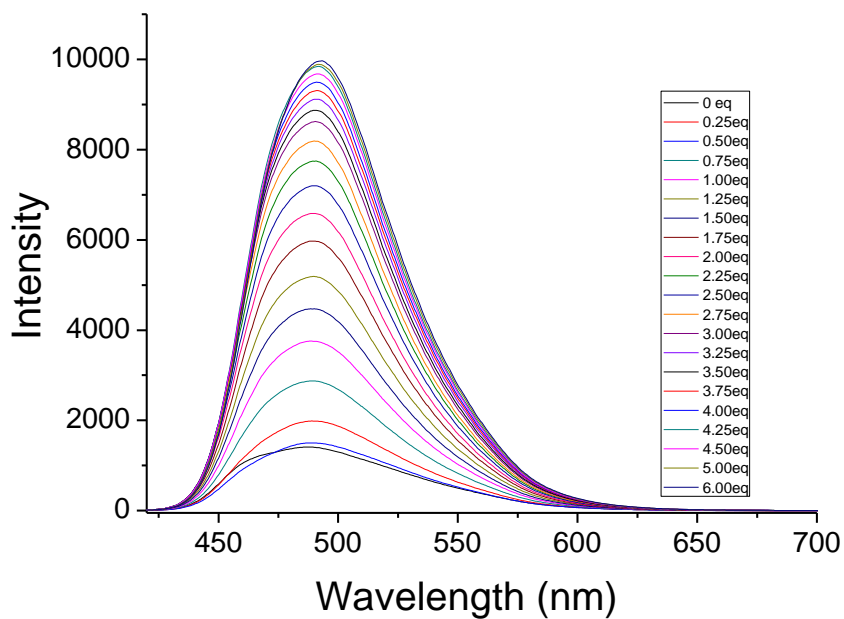

**Figure S8.** Fluorescence emission spectra of **1** (6.0 μM) upon addition of TBACl (from 0 to 6 equiv) in THF at 25 °C.  $\lambda_{\text{ex}} = 400$  nm.

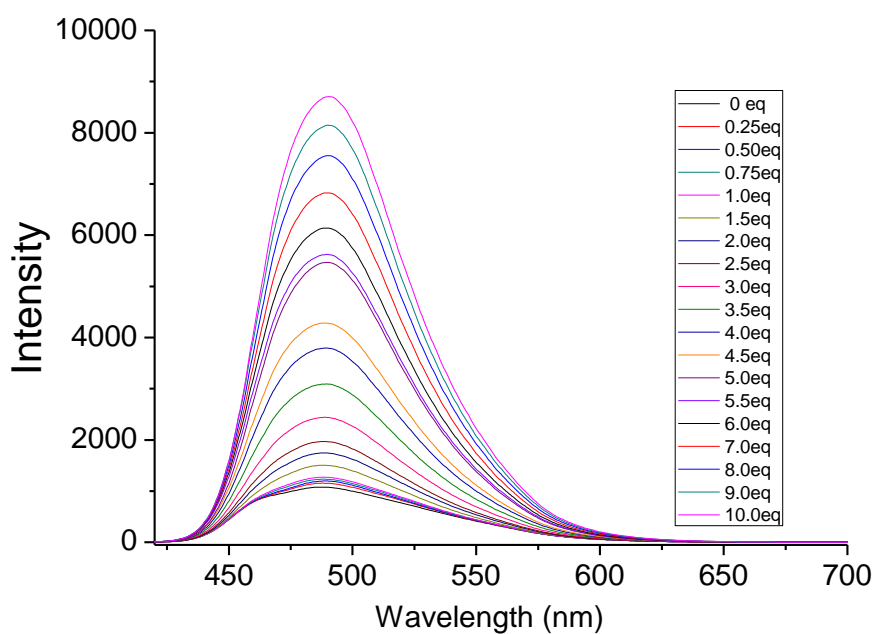

**Figure S9.** Fluorescence emission spectra of **1** (6.0 μM) upon addition of TBABr (from 0 to 10 equiv) in THF at 25 °C.  $\lambda_{\text{ex}} = 400$  nm.

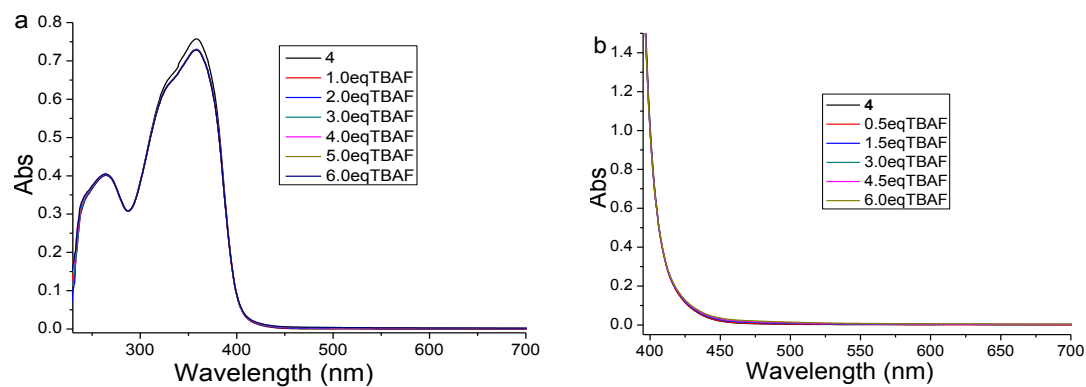

**Figure S10.** UV-vis absorption spectra of compound **4** (a) 0.01 mM and (b) 0.1 mM upon addition of TBAF in THF at 25 °C

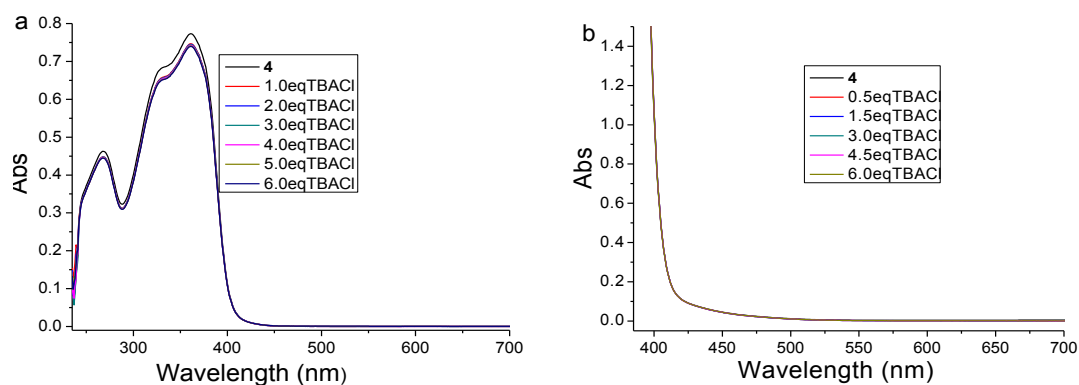

**Figure S11.** UV-vis absorption spectra of compound **4** (a) 0.01 mM and (b) 0.1 mM upon addition of TBACl in THF at 25 °C.

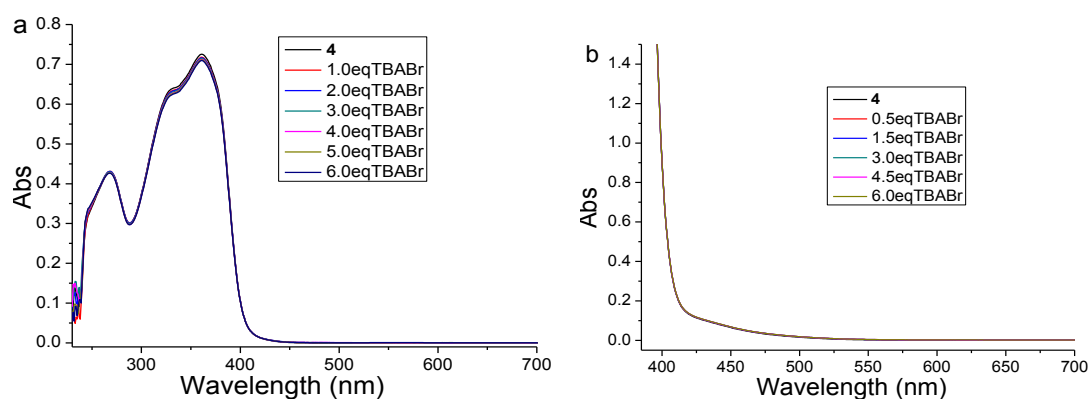

**Figure S12.** UV-vis absorption spectra of compound **4** (a) 0.01 mM and (b) 0.1 mM upon addition of TBABr in THF at 25 °C.

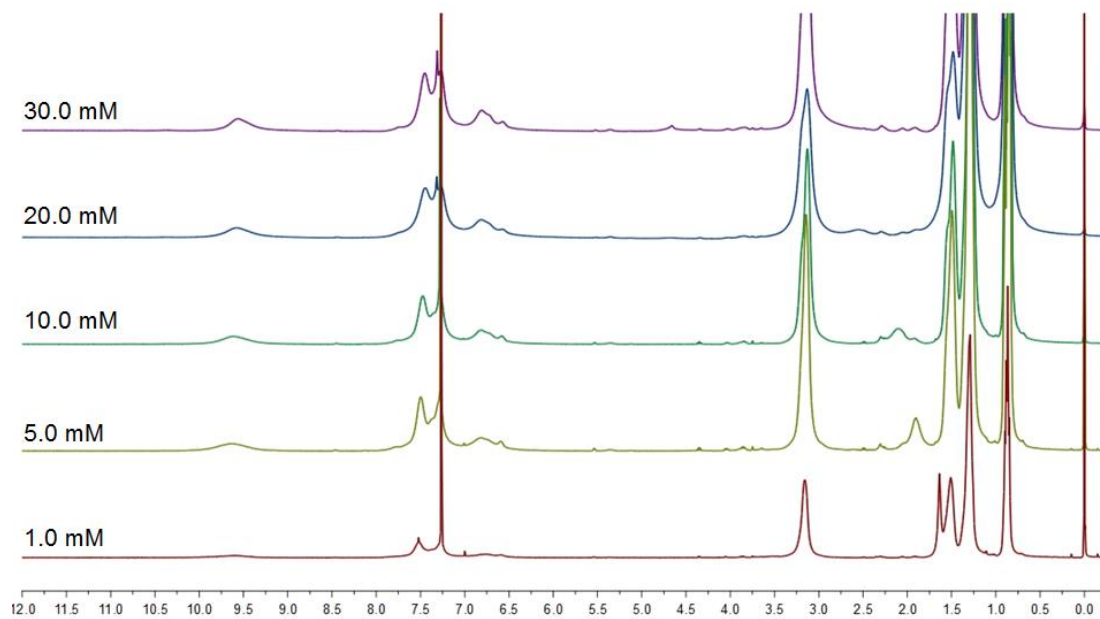

**Figure S13.** The  $^1\text{H}$  NMR (400 MHz) dilution spectra of a mixture of **1** and TBACl (1:3) in  $\text{CDCl}_3$  at  $25^\circ\text{C}$ .

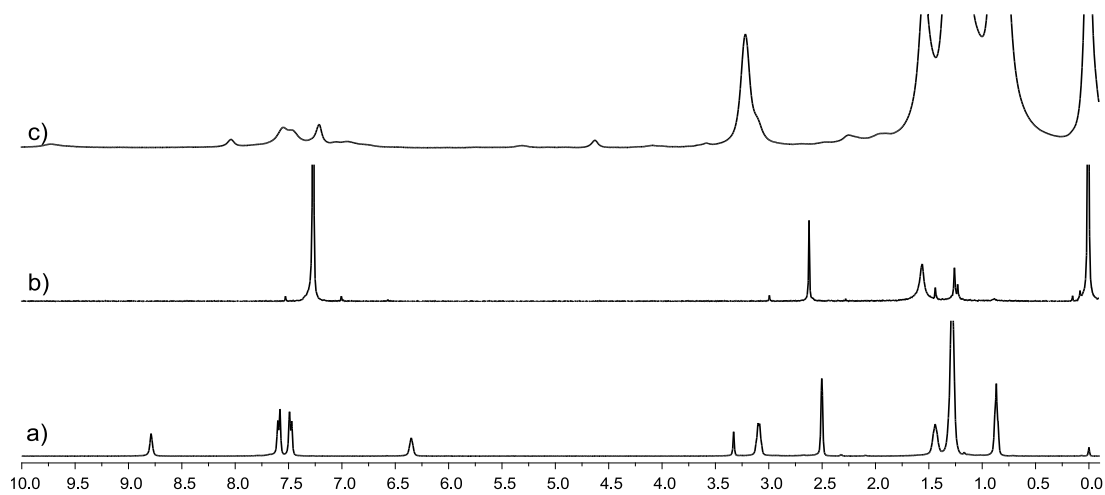

**Figure S14.** Partial  $^1\text{H}$  NMR (400 MHz) spectra of (a) **1** in  $\text{DMSO}-d_6$ , (b) suspension of **1** in  $\text{CDCl}_3$ , and (c) **1** + TBABr (1:3) in  $\text{CDCl}_3$  at  $25^\circ\text{C}$ .



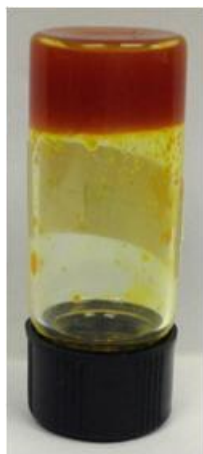

**Figure S15.** Picture for the organogel fabricated from **1** and TBACl (1:3) in  $\text{CHCl}_3$ .

Mixture of **1** (1.0 mM) + TBACl (3.0 mM) in  $\text{CDCl}_3$

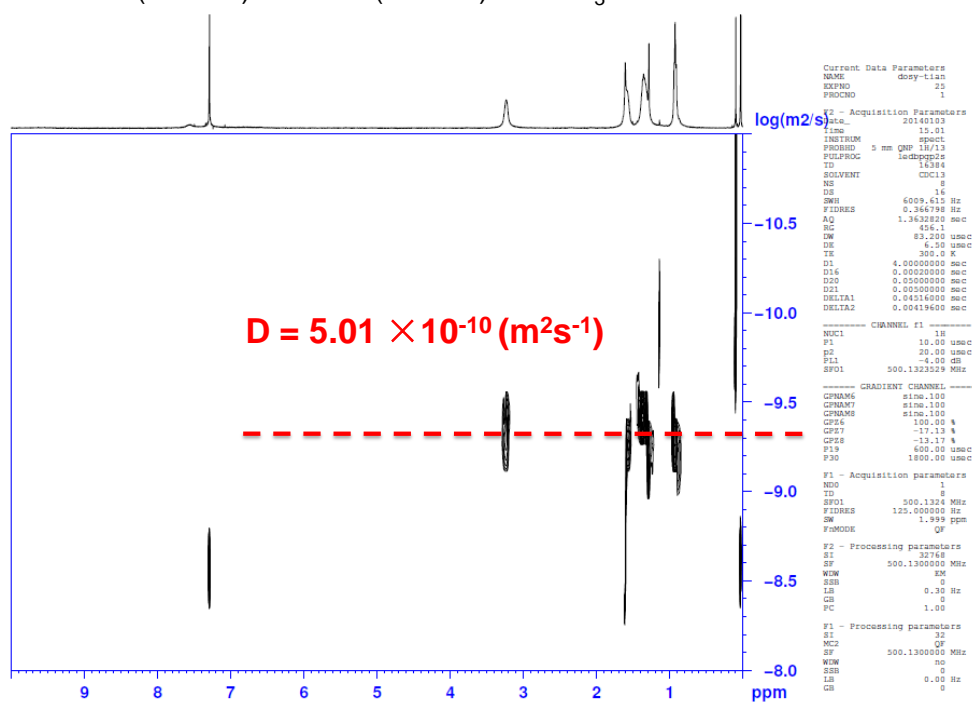

Mixture of **1** (5.0 mM) + TBACl (15.0 mM) in CDCl<sub>3</sub>

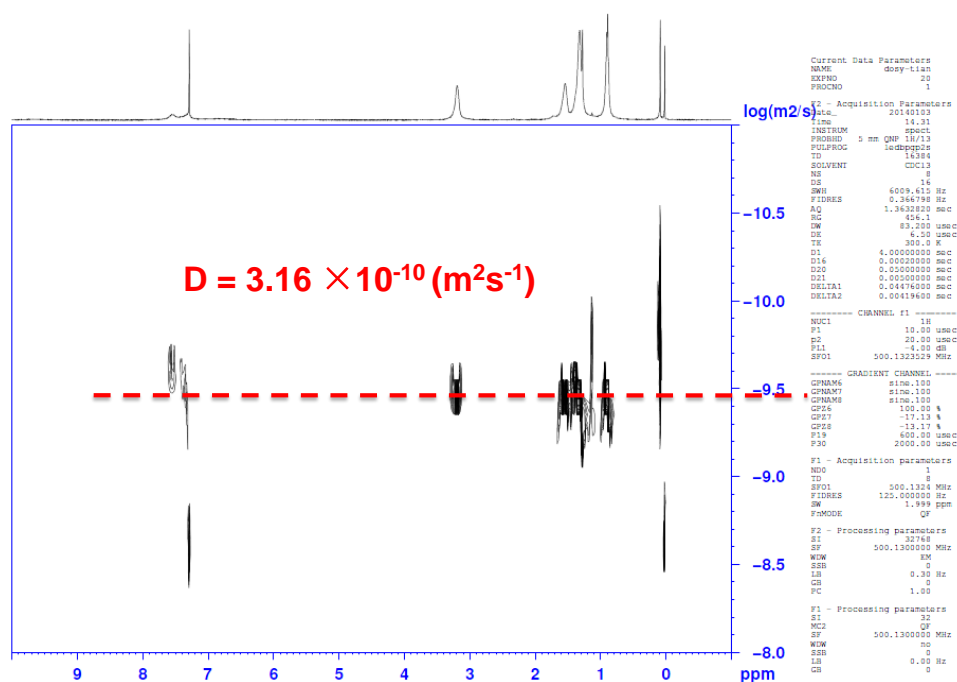

Mixture of **1** (10.0 mM) + TBACl (30.0 mM) in CDCl<sub>3</sub>

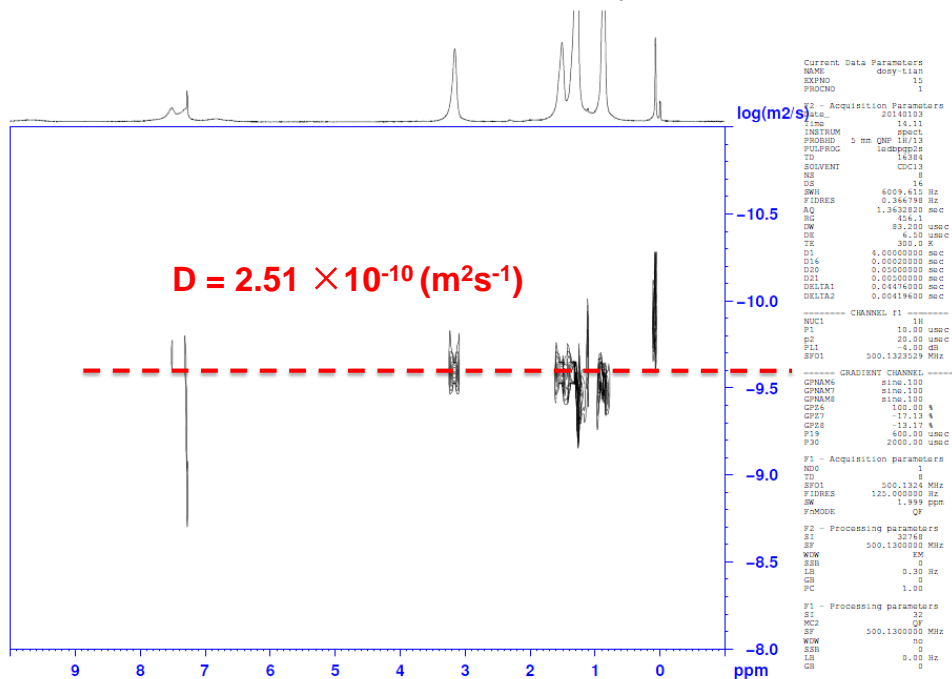

**Figure S16.** DOSY-NMR spectra of the solution of **1** and TBACl (1:3) in CDCl<sub>3</sub> at different concentrations at 25 °C.

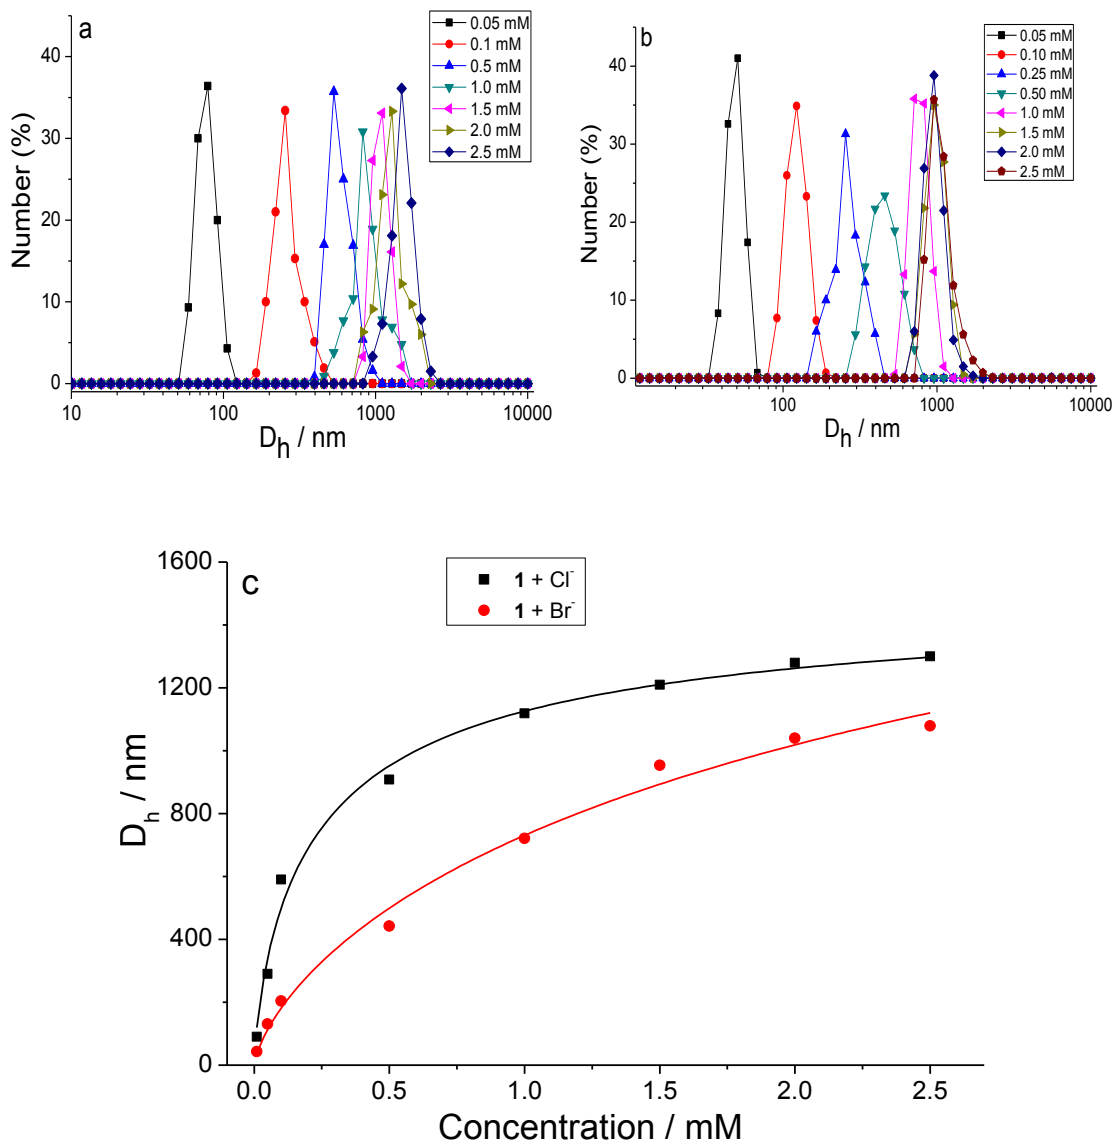

**Figure S17.** DLS profiles of the mixtures of **1** with 3.0 equiv of (a) TBACl, (b) TBABr in  $\text{CHCl}_3$  at different concentrations at 25 °C, and (c) plots of hydrodynamic diameter ( $D_h$ ) versus concentration.

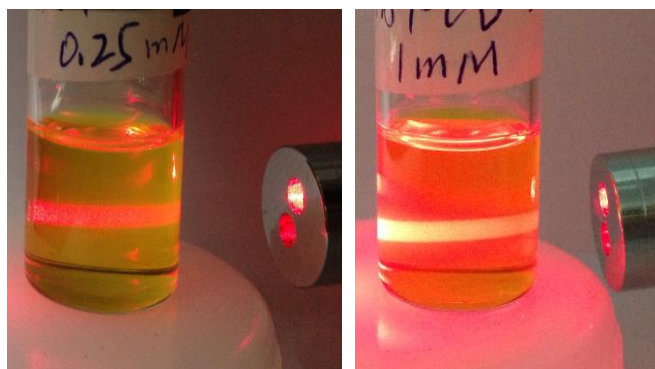

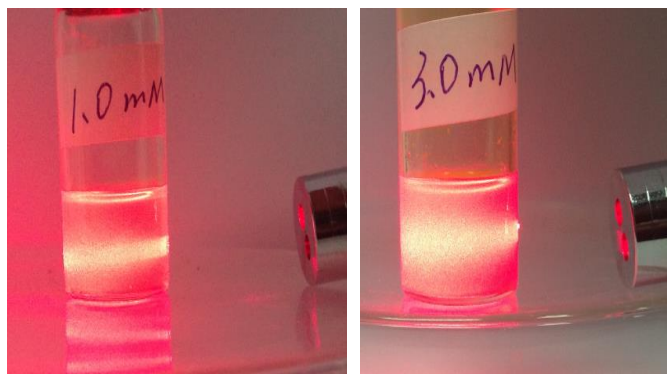

**Figure S18.** Pictures for the Tyndall effect of the solutions prepared from the mixtures of **1** with 3.0 equiv of TBACl (top) and TBABr (bottom).

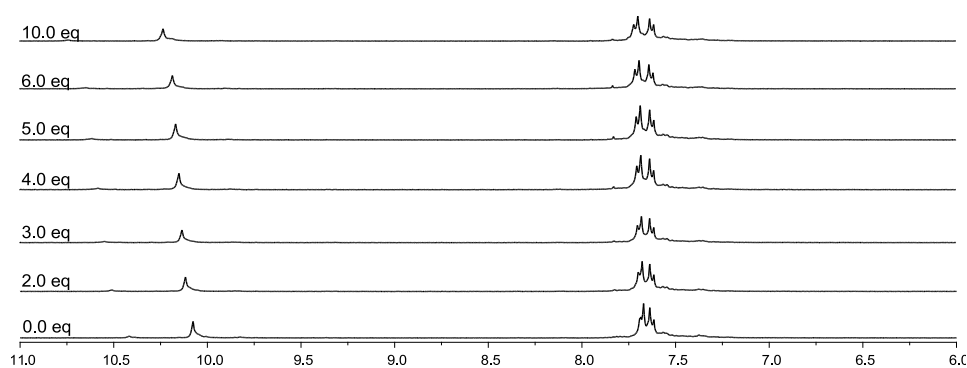

**Figure S19.** Partial  $^1\text{H}$  NMR (400 MHz) spectra of **6** (6.0 mM) upon addition of TBACl in  $\text{DMSO-}d_6$  at 25 °C.

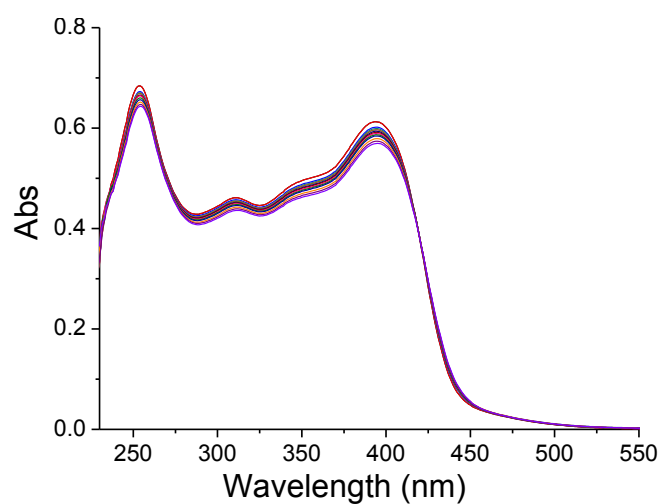

**Figure S20.** UV-vis absorption spectra of **6** (0.02 mM) upon addition of TBACl (from 0 to 8 equiv) in THF at 25 °C.

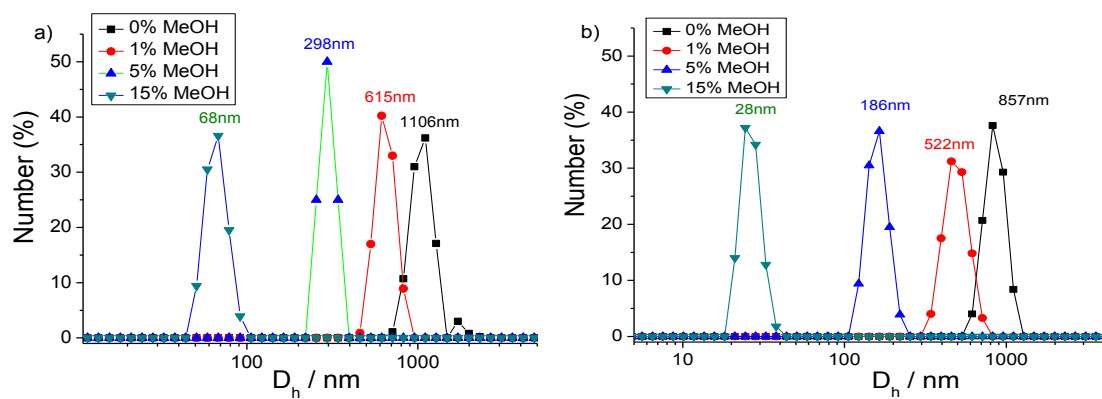

**Figure S21.** DLS profiles of **1** with 3.0 equiv of (a) TBACl and (b) TBABr upon adding different amount of methanol in their  $\text{CHCl}_3$  solution at 25 °C.

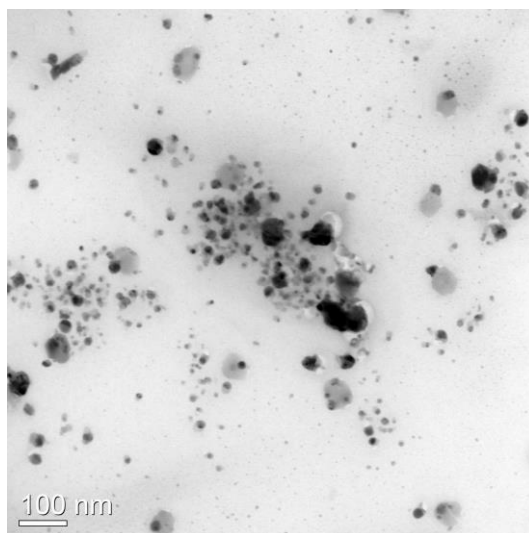

**Figure S22.** TEM image of the sample after the introduction of  $\text{Ag}^+$  into the solution of supramolecular polymer prepared from **1** and TBACl.

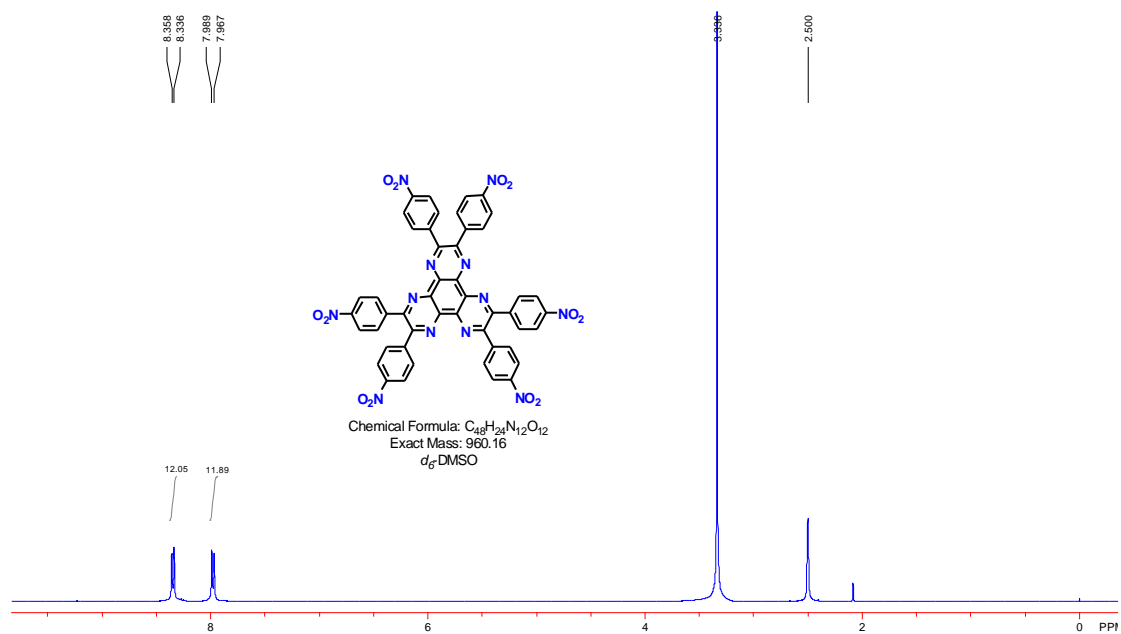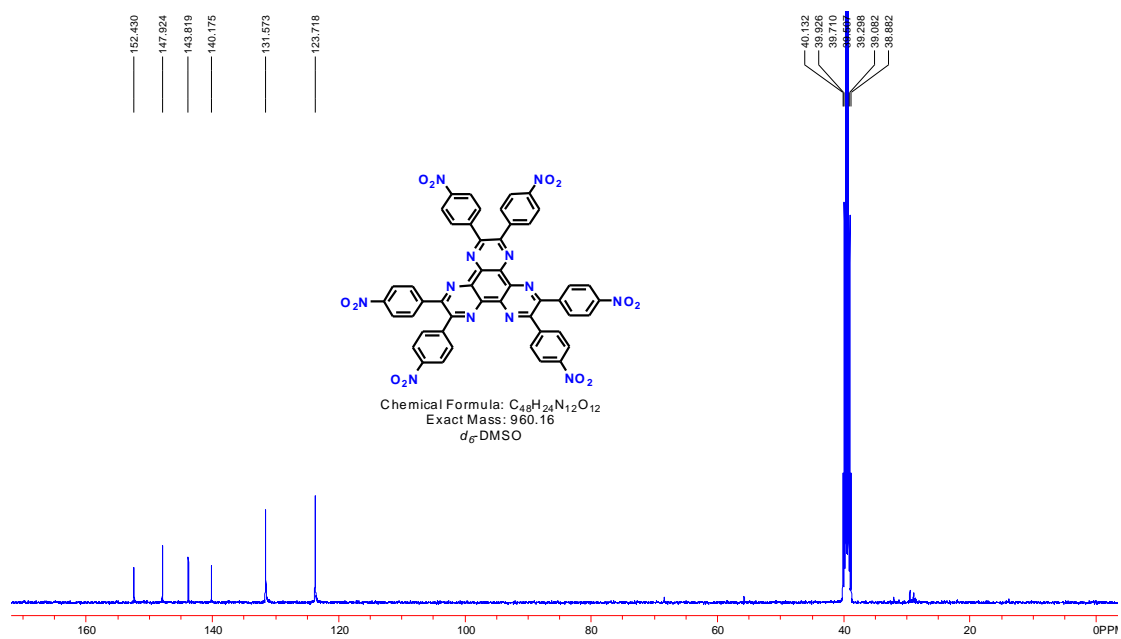

**Figure S23.**  $^1H$  NMR and  $^{13}C$  NMR spectra of compound **4** in  $DMSO-d_6$ .

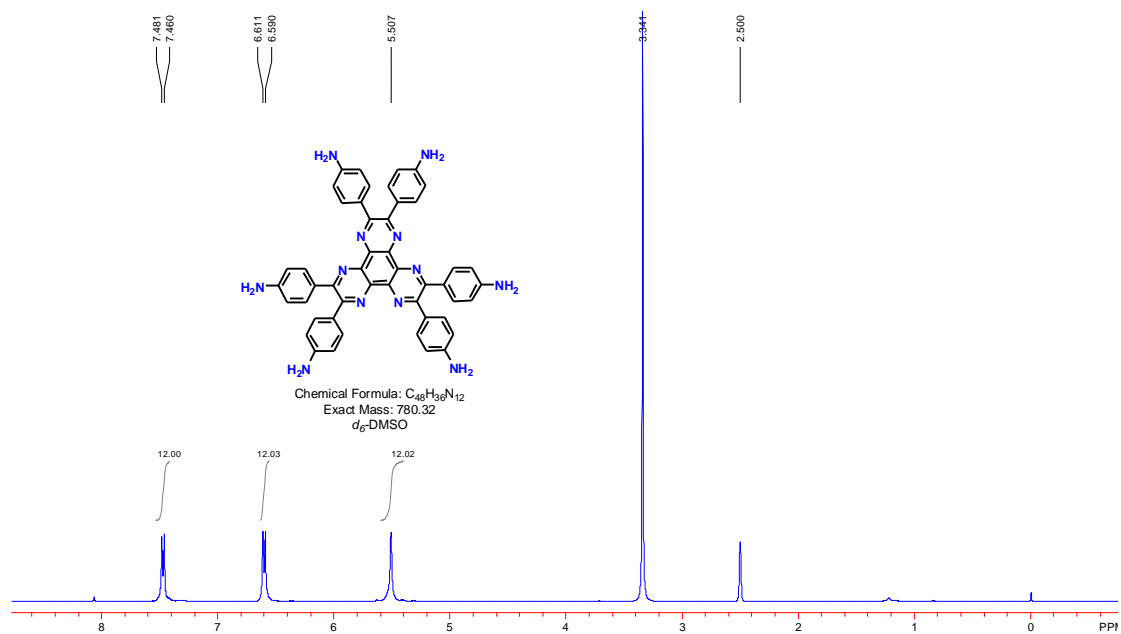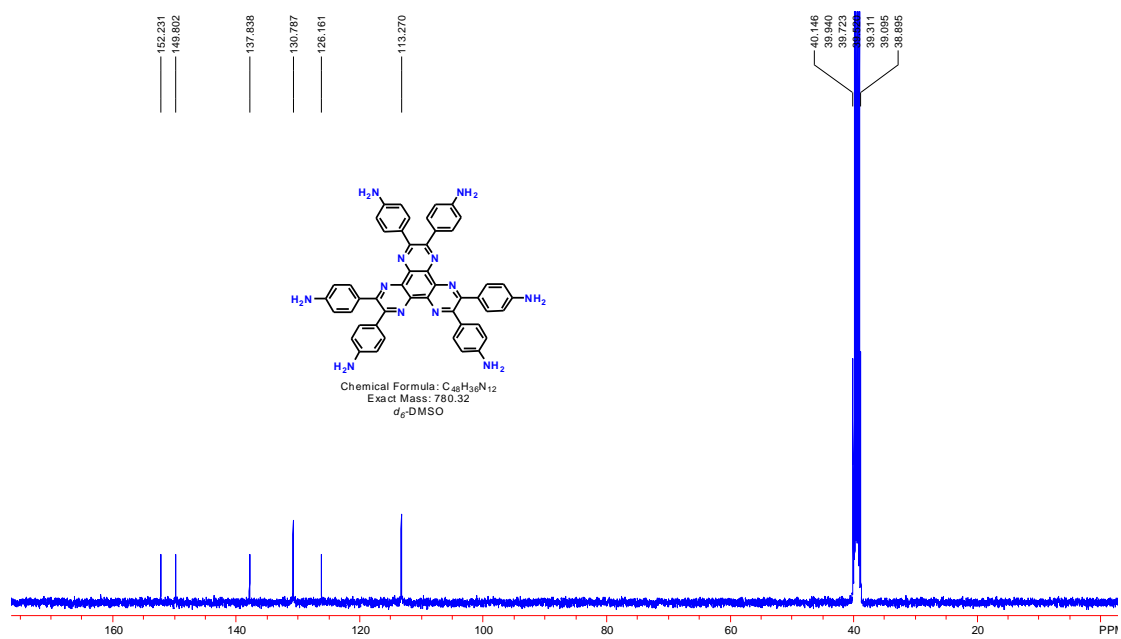

**Figure S24.**  $^1\text{H}$  NMR and  $^{13}\text{C}$  NMR spectra of compound **5** in  $\text{DMSO-}d_6$ .

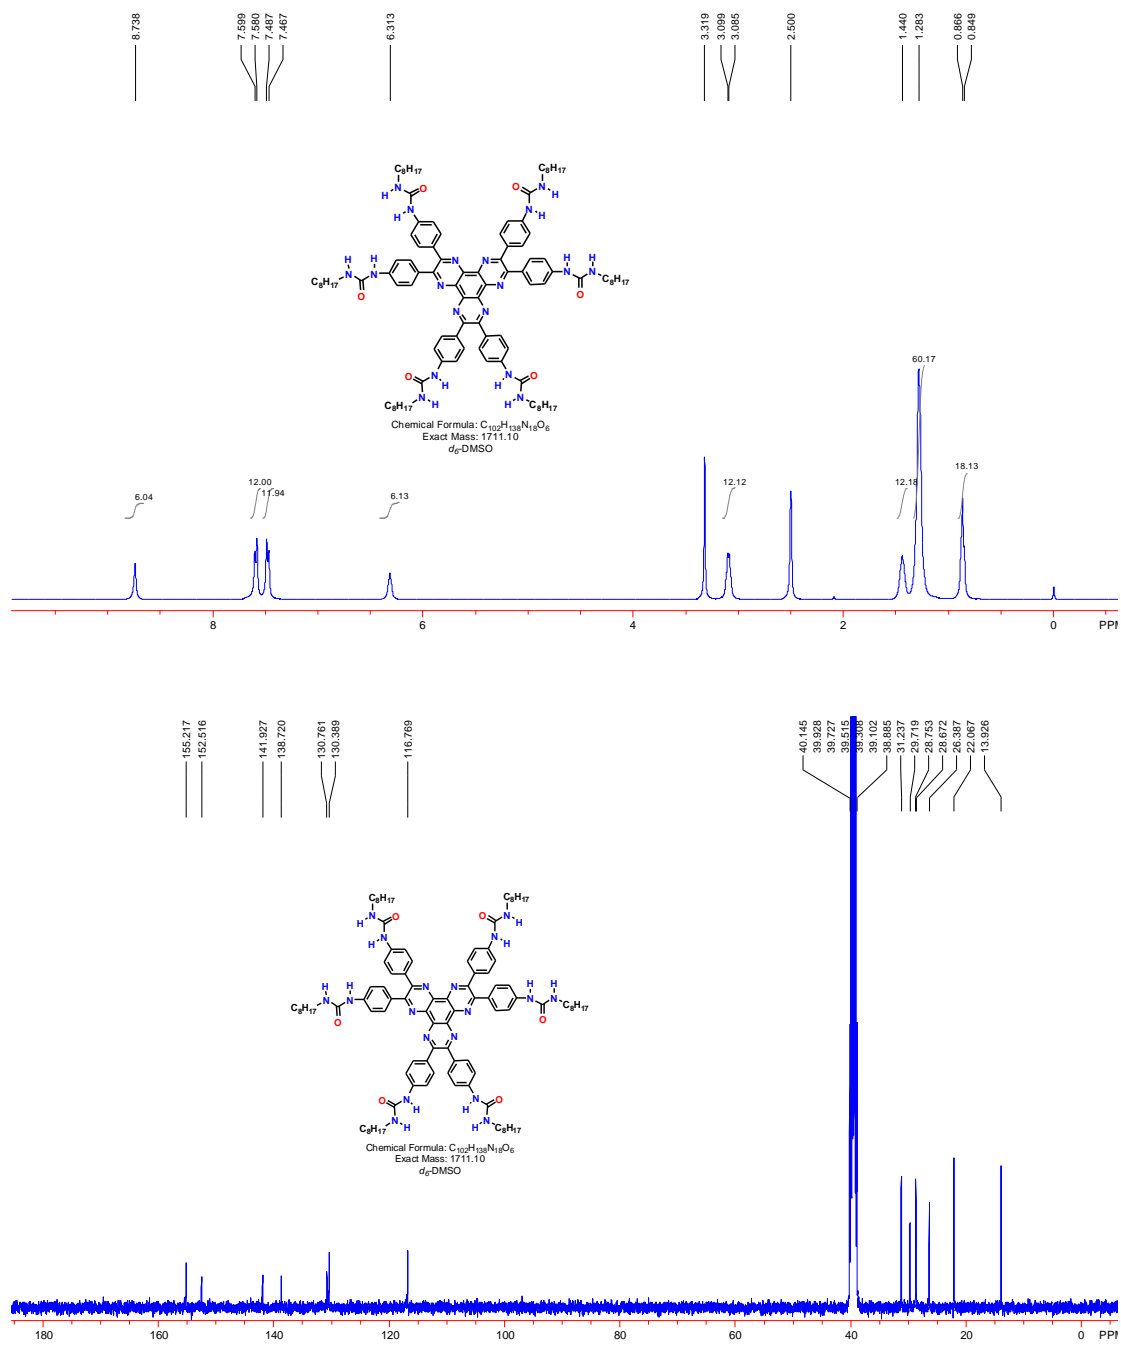

**Figure S25.**  $^1H$  NMR and  $^{13}C$  NMR spectra of compound **1** in  $DMSO-d_6$ .



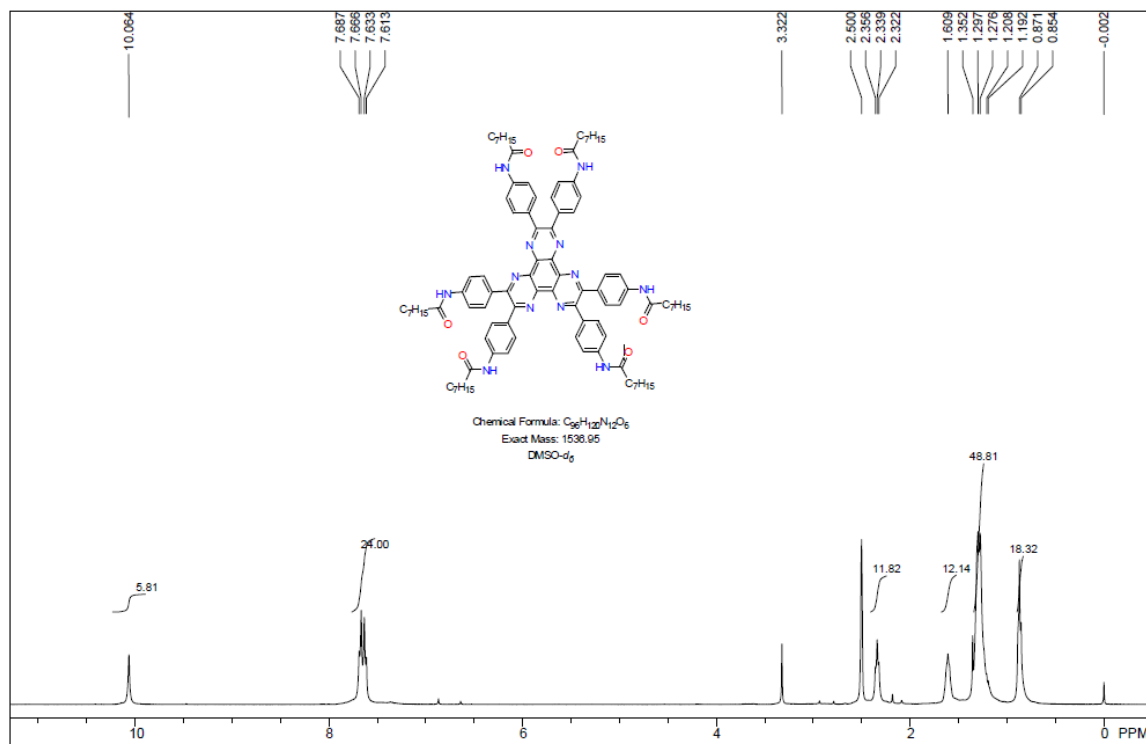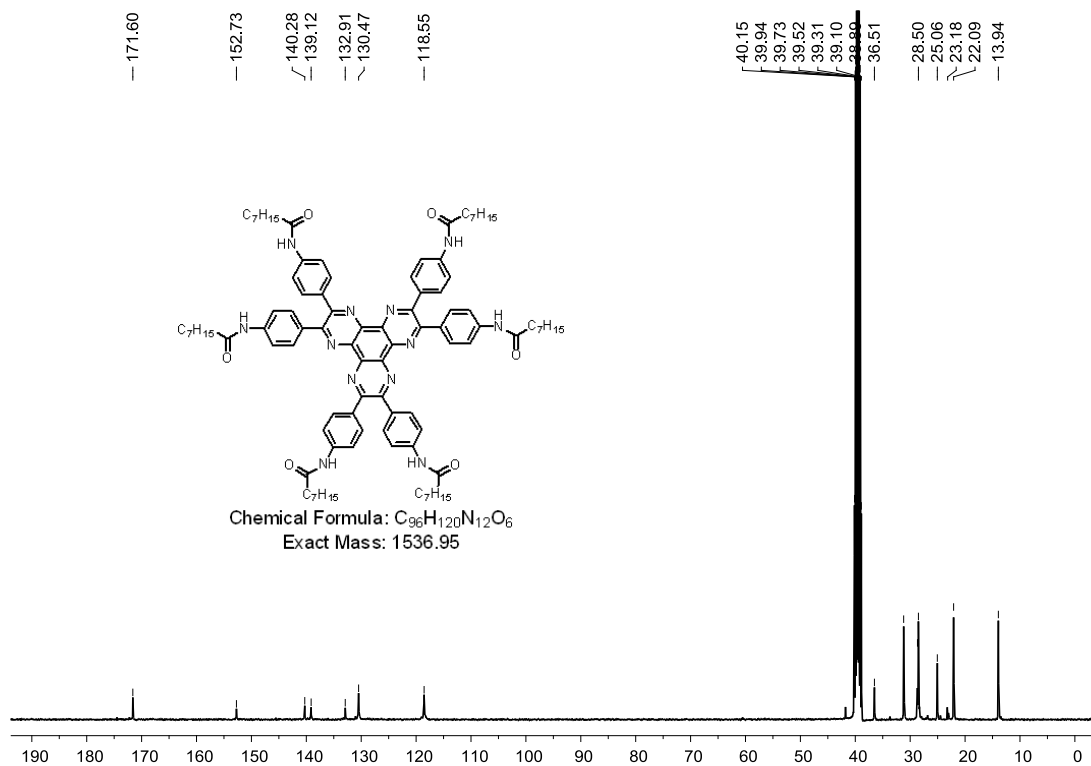

Figure S26.  $^1\text{H}$  NMR and  $^{13}\text{C}$  NMR spectra of compound **6** in DMSO- $d_6$ .
